# Supplementary material for: Anti-Cancer and Immunomodulatory Activity of a Polyethylene Glycol-Betulinic Acid Conjugate on Pancreatic Cancer Cells
Source: MDPI journal article supplement (doi:10.3390/life11060462), 2021-05-21
Supplement: s1 [file s1]

## Supplementary files

### A) Isolation of Peripheral Blood Mononuclear Cells

The cells were isolated from whole blood taken from patients and the control group after receiving informed consent and ethics clearance (M170440). After separating the plasma, the blood was diluted in a 1:1 ratio using Roswell Park Memorial Institute (RPMI) medium without foetal bovine serum (Sigma Aldrich, St Louis, MI, USA). The diluted blood was layered onto ficoll at a 2:1 ratio. This was followed by centrifugation at  $1734 \times g$ , for 30 min, RT with the brakes off. The PBMCs were transferred to a new 50 mL falcon tube and washed ( $932 \times g$ , 10 min RT) with 30 mL of RPMI (Sigma Aldrich). Red blood cells were lysed using ammonium--chloride--potassium, or ACK (150 mM  $\text{NH}_4\text{Cl}$ , 10 mM  $\text{KHCO}_3$ , 0.1 mM EDTA, pH 7.2) for 5 min before washing with 15 mL of RPMI ( $277 \times g$ , RT, 10 minutes). The cells were resuspended and maintained in RPMI supplemented with 10% FBS, gentamicin, and antibiotic/antimycotic solution (complete RPMI). This was followed by stimulation for 2 h with  $2 \mu\text{g/mL}$  of phytohemagglutinin-protein (PHA-P) also known as lectin from *Phaseolus vulgaris* (Sigma Aldrich, St Louis, MI, USA) before treatment with compounds.

### B) Effect of compounds on IL-6

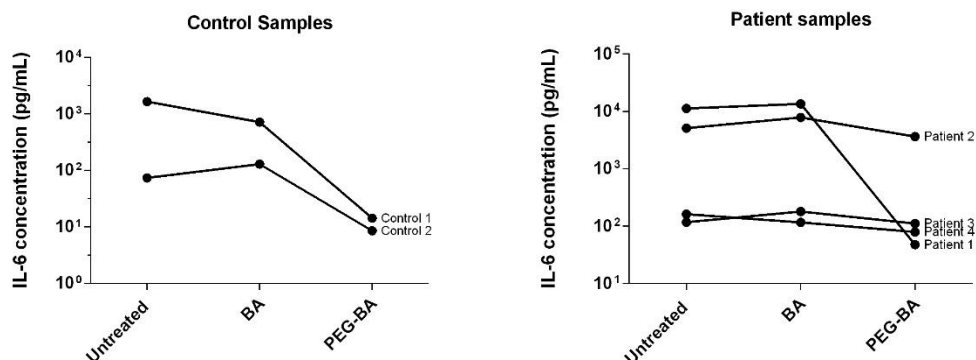

**Figure S1:** Line graph showing the effect of BA and PEG-BA on IL-6. A notable inhibition of IL-6 by PEG-BA is shown. The y-axis scale is Log<sub>10</sub>,  $n = 2$  controls,  $n = 4$  patients. Although there was a consistent decrease in IL-6 concentration when patient samples were treated with BA versus PEG-BA, it is evident that the responses for patient 3 and 4 were much reduced. This could be attributed to the varying degrees of inflammation occurring due to differences in cancer severity, i.e., locally advanced versus metastatic.

C) Effect of compounds on Th1Th2Th17 cytokines

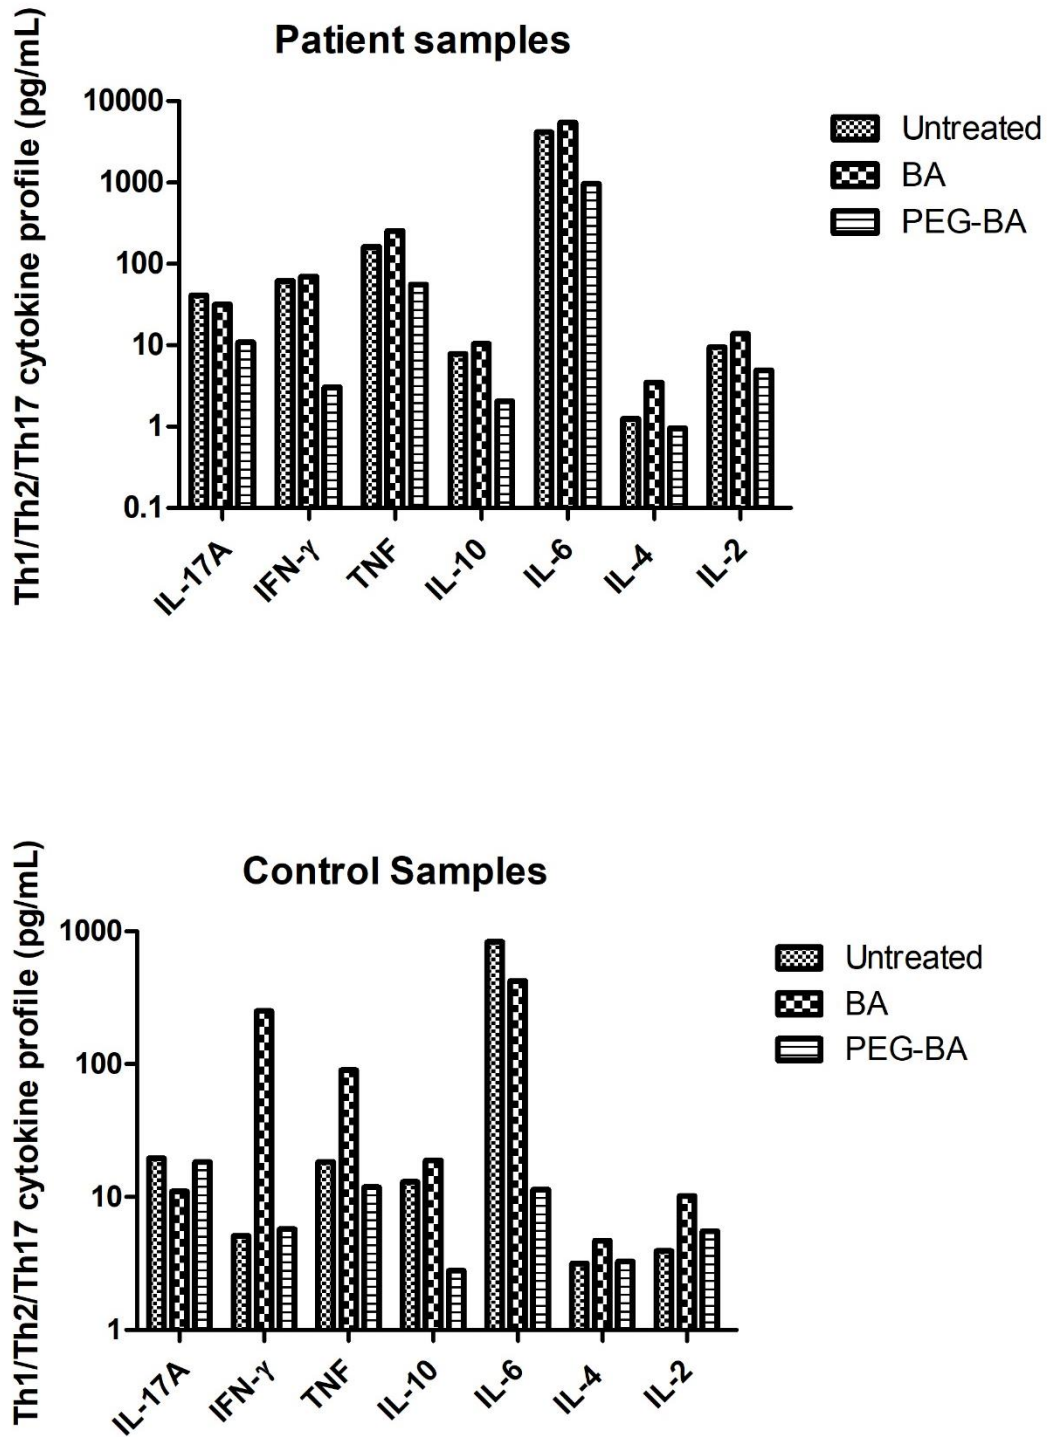

**Figure S2:** Effect of BA and PEG-BA on IL-17A, IFN- $\gamma$ , TNF- $\alpha$ , IL-10, IL-6, IL-4 and IL-2. A notable increase in the inhibition of IL-17A, IFN- $\gamma$ , TNF- $\alpha$ , IL-10 and IL-6 by PEG-BA was shown compared to that induced by BA mainly in the patient samples. The y-axis scale is Log10,  $n = 2$  controls,  $n = 4$  patients.

#### D) RT2 profiler plate layout

|   | 1     | 2     | 3       | 4     | 5       | 6     | 7        | 8       | 9      | 10     | 11      | 12      |
|---|-------|-------|---------|-------|---------|-------|----------|---------|--------|--------|---------|---------|
| A | ACSL3 | ACSL4 | ACSL5   | ADM   | ARNT    | ATF4  | AXIN2    | BAX     | BBC3   | BCL2   | BCL2A1  | BCL2L1  |
| B | BIRC3 | BMP2  | BMP4    | BTG2  | Ct9     | CCL5  | CCND1    | CCND2   | CDKN1A | CDKN1B | CEBPD   | CPT2    |
| C | CSF1  | DAB2  | EGFR    | EMP1  | EPO     | FABP1 | FAS      | FCER2   | FOSL1  | FTH1   | GADD45A | GADD45B |
| D | GATA3 | GCLC  | GCLM    | GSR   | HERPUD1 | HES1  | HES5     | HEY1    | HEY2   | HEYL   | HMOX1   | ICAM1   |
| E | ID1   | IFNG  | IFRD1   | IRF1  | JAG1    | LDHA  | LFNG     | LRG1    | MCL1   | MMP7   | MYC     | NOTCH1  |
| F | NGO1  | OLR1  | PCNA    | PPARD | PITCH1  | RB1   | SERPINE1 | SLC27A4 | SLC2A1 | SOC3   | SORBS1  | SQSTM1  |
| G | STAT1 | TNF   | TNFSF10 | TXN   | TXNRD1  | VEGFA | WISP1    | WNT1    | WNT2B  | WNT3A  | WNT5A   | WNT6    |
| H | ACTB  | B2M   | GAPDH   | HPRT1 | RPLP0   | HGDC  | RTC      | RTC     | RTC    | PPC    | PPC     | PPC     |

**Figure S3:** The 96-plate layout of the human signal transduction RT<sup>2</sup> profiler PCR array panel with the position of the genes.

**Table S1:** Full names of dysregulated genes

| <b>Gene symbol</b> | <b>Gene name</b>                                   |
|--------------------|----------------------------------------------------|
| <i>WISP1</i>       | WNT1-inducible-signaling pathway protein 1         |
| <i>TXNRD1</i>      | Thioredoxin reductase 1                            |
| <i>ACTB</i>        | Actin Beta                                         |
| <i>GADD45B</i>     | Growth arrest and DNA-damage-inducible, beta       |
| <i>AXIN2</i>       | Axin-related protein                               |
| <i>STAT1</i>       | Signal transducer and activator of transcription 1 |
| <i>ACSL4</i>       | Acyl-CoA Synthetase Long Chain Family Member<br>4  |
| <i>FTH1</i>        | Ferritin heavy chain 1                             |
| <i>NQO1</i>        | NAD(P)H dehydrogenase [quinone] 1                  |
| <i>VEGFA</i>       | Vascular Endothelial Growth Factor A               |
| <i>ADM</i>         | Adrenomedullin                                     |
| <i>LRG1</i>        | Leucine-rich alpha-2-glycoprotein                  |
| <i>GATA3</i>       | GATA binding protein 3                             |
| <i>CCND1</i>       | B-cell leukemia/lymphoma 1                         |
| <i>CEBPD</i>       | CCAAT Enhancer Binding Protein Delta               |
| <i>CDKN1A</i>      | Cyclin Dependent Kinase Inhibitor 1A               |
| <i>BTG2</i>        | BTG Anti-Proliferation Factor 2                    |
| <i>HES5</i>        | Hes Family BHLH Transcription Factor 5             |
| <i>WNT3A</i>       | Wingless-related integration site 3 A              |
| <i>BCL2</i>        | B-cell lymphoma 2                                  |
| <i>ACSL4</i>       | Acyl-CoA Synthetase Long Chain Family Member<br>4  |
| <i>SLC2A1</i>      | Solute carrier family 2 member 1                   |
| <i>GAPDH</i>       | Glyceraldehyde 3-phosphate dehydrogenase           |
